# Supplementary material for: Curcumin Enhances the Antitumoral Effect Induced by the Recombinant Vaccinia Neu Vaccine (rV-neuT) in Mice with Transplanted Salivary Gland Carcinoma Cells
Source: PubMed Central journal article supplement (PMC7284625; doi:10.3390/nu12051417), 2020-05-14
Supplement: nutrients-12-01417-s001.pdf [file nutrients-12-01417-s001.pdf]

Supplementary Materials

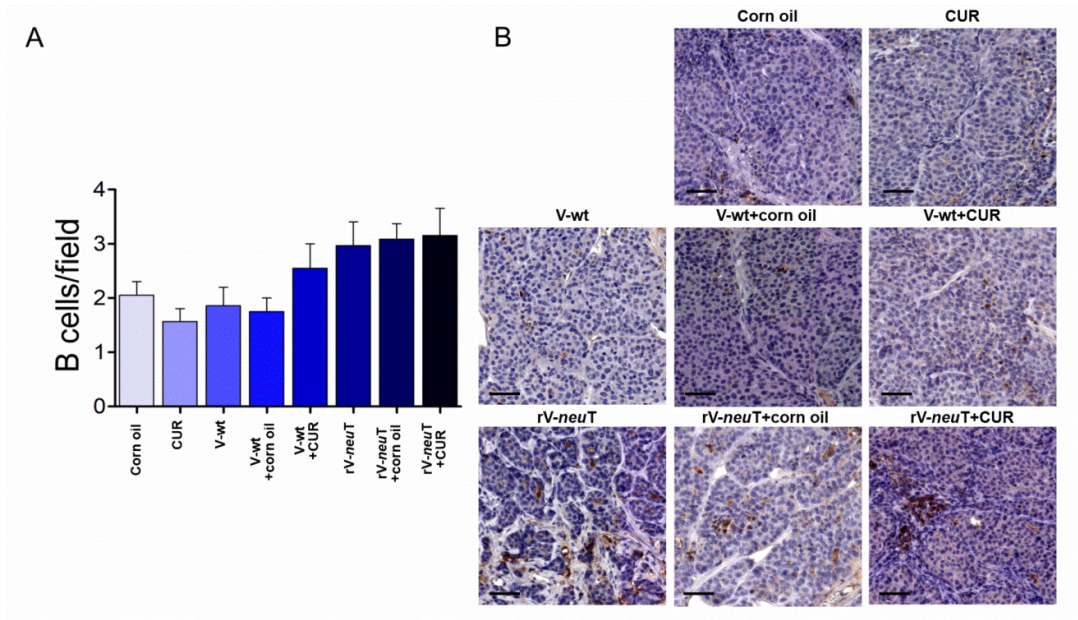

**Figure S1. B cells infiltrating tumors in BALB-*neuT* mice after treatments.** Tumor tissues from three mice in each group were analysed with IHC for CD19 expression. (A) Positive cell count/field averaging 10 representative microscopic field (mean±SD; 1way-ANOVA, Tukey's multiple comparison). (B) Representative digital images (20x), scale bar represents 100 μm. CUR: curcumin.

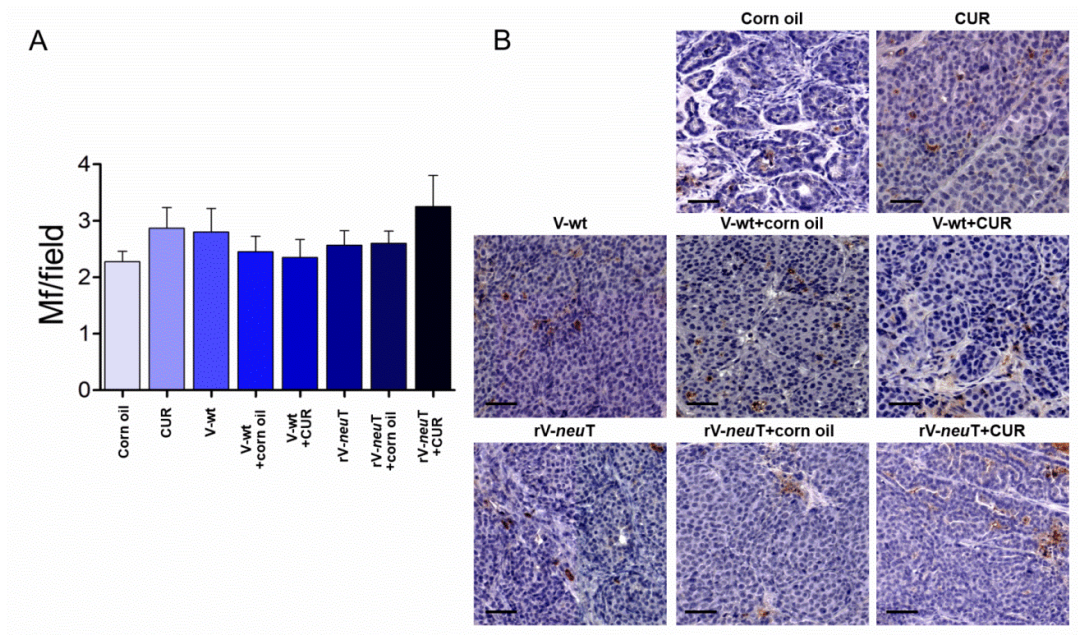

**Figure S2. Macrophages infiltrating tumors in BALB-*neuT* mice after treatments.** Tumor tissues from three mice in each group were analysed with IHC for f4/80 expression. (A) Positive cell count/field averaging 10 representative microscopic field (mean±SD; 1way-ANOVA, Tukey's multiple comparison). (B) Representative digital images (20x), scale bar represents 100 μm. Mf: macrophages, CUR: curcumin.

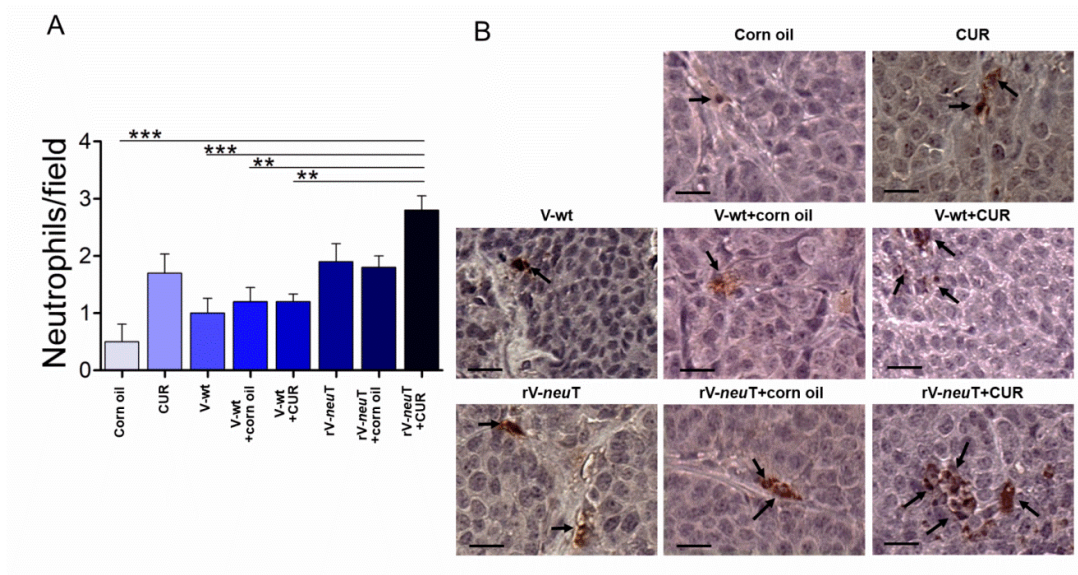

**Figure S3. Neutrophils infiltrating tumors in BALB-*neuT* mice after treatments.** Tumor tissues from three mice in each group were analysed with IHC for Gr1 expression (arrow). (A) Positive cell count/field averaging 10 representative microscopic field (mean $\pm$ SD, \*\* $p\leq 0.01$ ; \*\*\* $p\leq 0.001$ ; 1way-ANOVA, Tukey's multiple comparison). (B) Representative digital images (40 $\times$ ), scale bar represents 50  $\mu$ m. CUR: curcumin.
